# Supplementary material for: Age-Related Changes in Dynamic Iris Behavior Assessed Using a Programmable Closed-Loop Iris Control System
Source: PubMed Central journal article supplement — Transl Vis Sci Technol. 2022 Nov 14;11(11):9. doi: 10.1167/tvst.11.11.9 (PMC9669806; doi:10.1167/tvst.11.11.9), 2022-11-14
Supplement: tvst-11-11-9_s002.pdf [file tvst-11-11-9_s002.pdf]

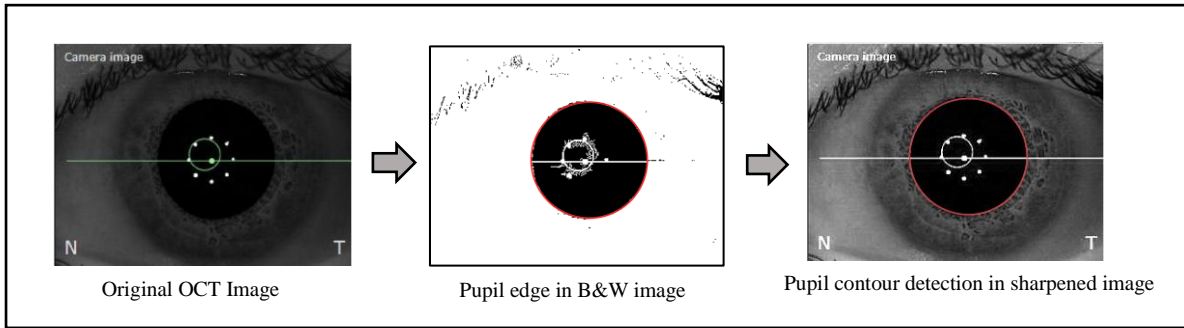

**Supplementary Figure 2.** Image processing and pupillary diameter measurement. Unprocessed (left) and post-processed (center) images of the eye captured through the ANTERION. The pupillary contour map (red circle) accurately detects the border of the pupil (right).
