# Supplementary material for: Age-Related Changes in Dynamic Iris Behavior Assessed Using a Programmable Closed-Loop Iris Control System
Source: PubMed Central journal article supplement — Transl Vis Sci Technol. 2022 Nov 14;11(11):9. doi: 10.1167/tvst.11.11.9 (PMC9669806; doi:10.1167/tvst.11.11.9), 2022-11-14
Supplement: tvst-11-11-9_s003.pdf [file tvst-11-11-9_s003.pdf]

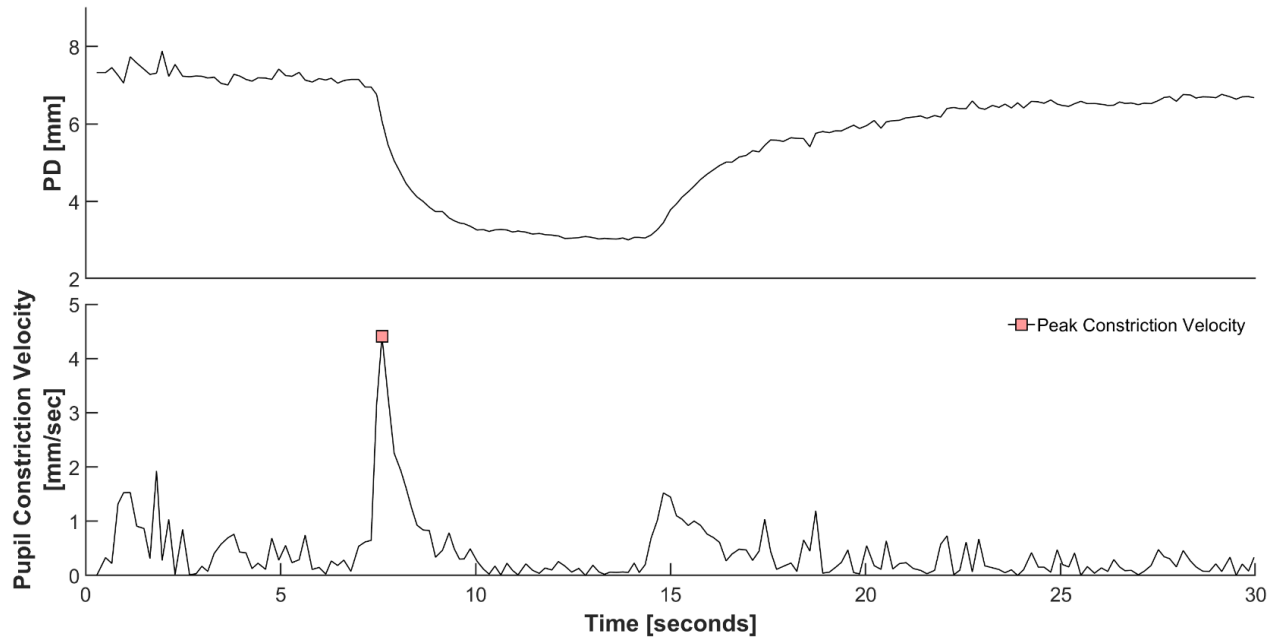

**Supplementary Figure 3.** Pupillary diameter (PD) during the first 30 seconds of a scan session (top) with the corresponding pupil constriction velocity (PCV) plot (bottom).
