# Supplementary material for: Age-Related Changes in Dynamic Iris Behavior Assessed Using a Programmable Closed-Loop Iris Control System
Source: PubMed Central journal article supplement — Transl Vis Sci Technol. 2022 Nov 14;11(11):9. doi: 10.1167/tvst.11.11.9 (PMC9669806; doi:10.1167/tvst.11.11.9), 2022-11-14
Supplement: tvst-11-11-9_s004.pdf [file tvst-11-11-9_s004.pdf]

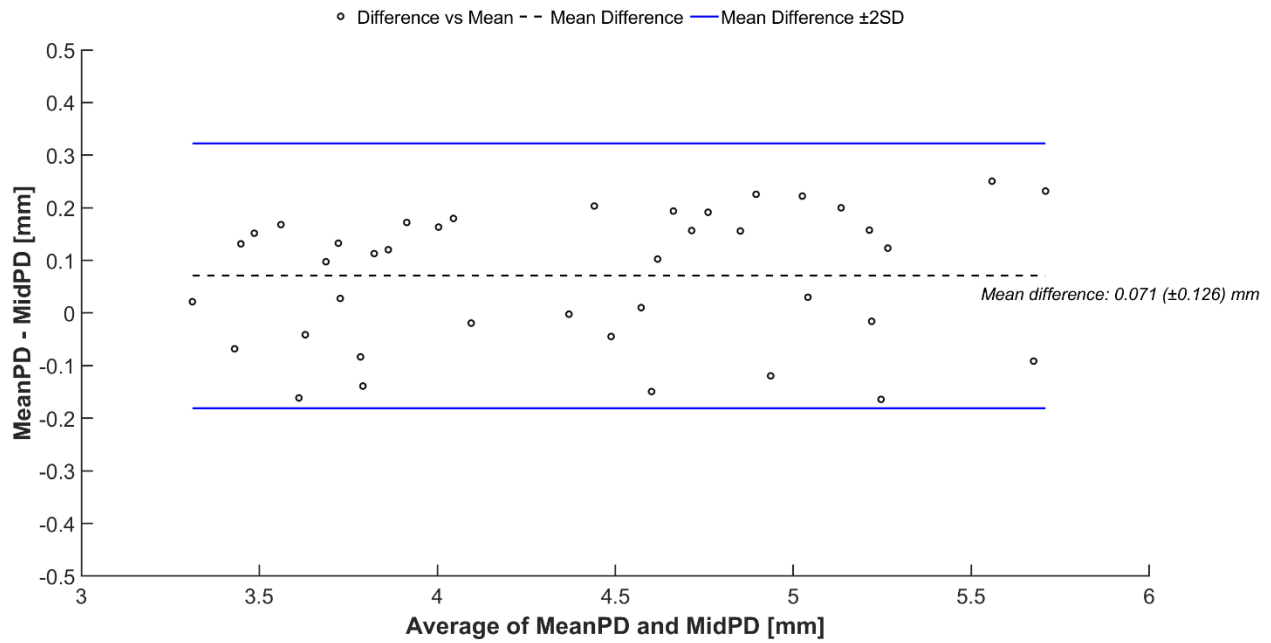

**Supplementary Figure 4.** Bland-Altman plot comparing the calculated mid-dilated pupillary diameter (*MidPD*) and the mean pupillary diameter (PD) during the last 10 seconds of one session eye participant (*MeanPD*) in the secondary analysis.
