# Supplementary material for: Age-Related Changes in Dynamic Iris Behavior Assessed Using a Programmable Closed-Loop Iris Control System
Source: PubMed Central journal article supplement — Transl Vis Sci Technol. 2022 Nov 14;11(11):9. doi: 10.1167/tvst.11.11.9 (PMC9669806; doi:10.1167/tvst.11.11.9), 2022-11-14
Supplement: tvst-11-11-9_s005.pdf [file tvst-11-11-9_s005.pdf]

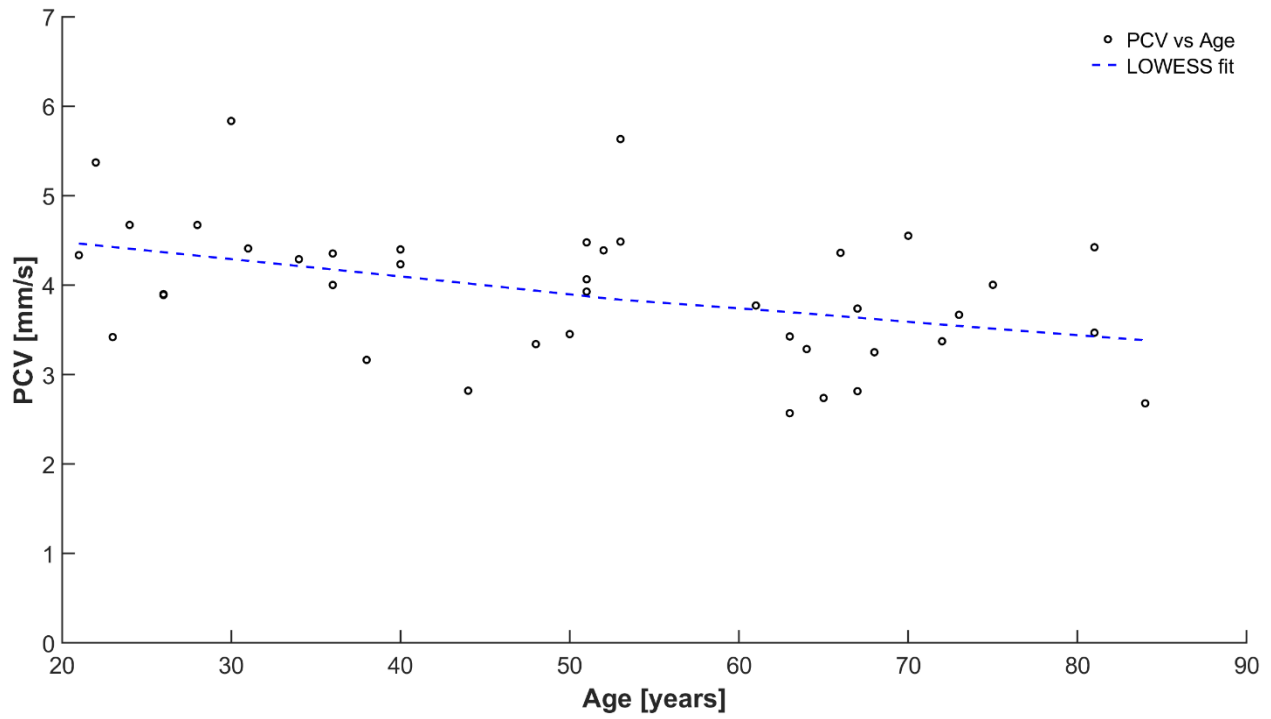

**Supplementary Figure 5.** Relationship between peak constriction velocity (PCV) and age for successful sessions using the stricter definition. LOWESS regression (blue dashed line) shows a negative linear relationship between PCV and age ( $p = 0.005$ ).
