# Supplementary figures and images for: Age-Related Changes in Dynamic Iris Behavior Assessed Using a Programmable Closed-Loop Iris Control System
Source: PubMed Central journal article supplement — Transl Vis Sci Technol. 2022 Nov 14;11(11):9. doi: 10.1167/tvst.11.11.9 (PMC9669806; doi:10.1167/tvst.11.11.9), 2022-11-14

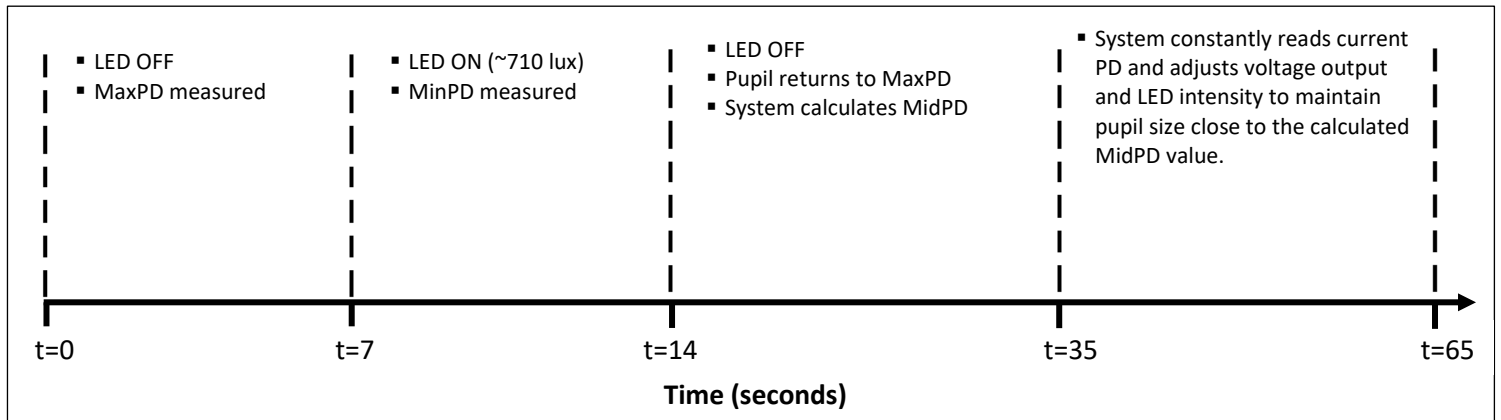

**Supplementary Figure 1.** Imaging protocol diagram.

Supplement: tvst-11-11-9_s001.pdf [file tvst-11-11-9_s001.pdf]
